# Supplementary material for: Individualized genetic makeup that controls natural killer cell function influences the efficacy of isatuximab immunotherapy in patients with multiple myeloma
Source: HighWire-hosted journal article supplement (doi:10.1136/jitc-2021-002958), 2021-07-01
Supplement: jitc-2021-002958supp005_data_supplement.pdf [file jitc-2021-002958supp005_data_supplement.pdf]

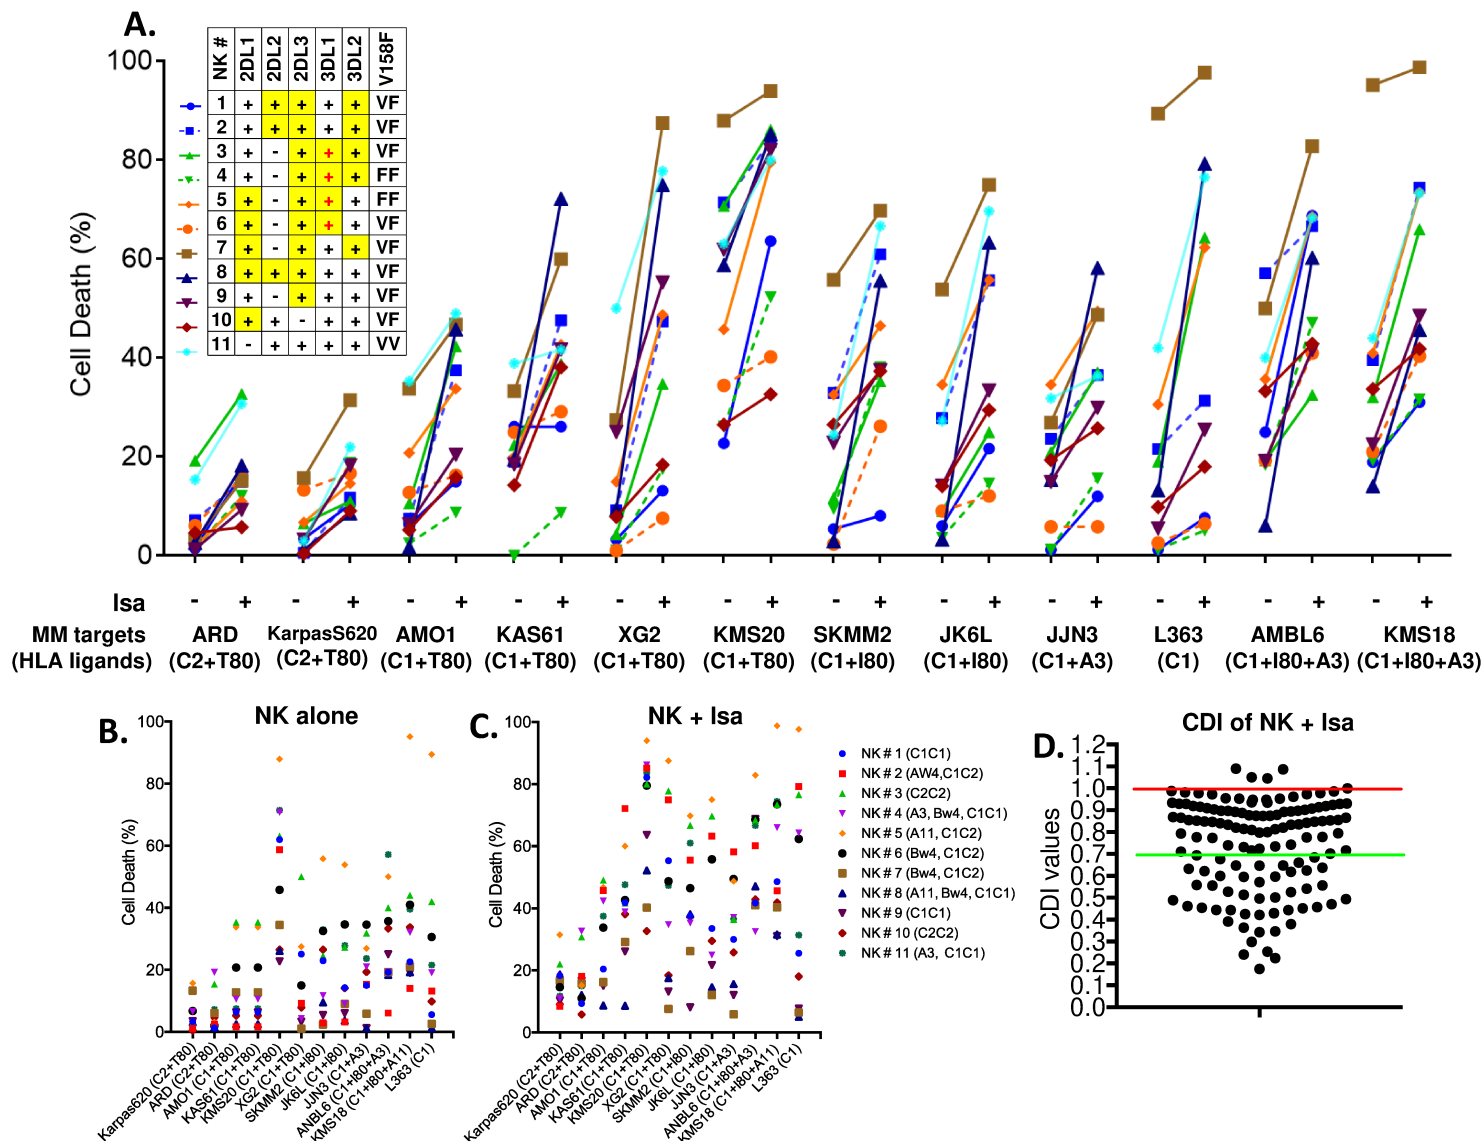

**Figure S5: Mechanistic studies confirm the role of KIR+HLA interactions in modulating Isa-dependent NK cytotoxicity of MM cells.** The primary NK cells kill MM cell lines, and the varied KIR+HLA compositions likely diversify the rate of killing (A, B). Supplementing Isa in NK+MM reactions enhanced the lysis into several folds. Mean CDI value = 0.73 (n=132). Data dots CDI value <1 represents synergism; <0.7 represents significant synergism. (A, C, D). The cognate HLA class I ligands of NK cells are given in parenthesis.
