# Supplementary material for: Individualized genetic makeup that controls natural killer cell function influences the efficacy of isatuximab immunotherapy in patients with multiple myeloma
Source: HighWire-hosted journal article supplement (doi:10.1136/jitc-2021-002958), 2021-07-01
Supplement: jitc-2021-002958supp010_data_supplement.xlsx [file jitc-2021-002958supp010_data_supplement.xlsx]

## Sheet: Table 2 
	Supplemental table S3: Myeloma patients with specific variants of KIR, HLA, and FCGR3A and median progression-free survival following Isa-Len-Dex therapy.
	Genotype	%		(n=57)	Median survival (months)	Hazard Ratio (HR)	95% CI	P Value
	KIR genotype
	AA	33		(19)	13.93	1	Ref.	Ref.
	Bx (AB/BB)	67		(38)	6.111	1.33	0.68 to 2.62	0.25
	KIR motif
	Centromeric AA	53		(30)	13.9302	1	Ref.	Ref.
	Centromeric AB	40		(23)	6.11088	1.255	0.63 to 2.49	0.5168
	Centromeric BB	7		(4)	2.92403	4.046	0.67 to 24.61	0.2755
	Centromeric Bx (AB/BB)	47		(27)	6.11	1.37	0.71 to 2.63	0.28
	Telomeric AA	60		(34)	9.692	1	Ref.	Ref.
	Telomeric AB	35		(20)	5.93	0.9735	0.48 to 1.97	0.9406
	Telomeric BB	5		(3)	8.542	1.135	0.27 to 4.81	0.8849
	Telomeric Bx (AB/BB)	40		(23)	6.11	1.03	0.52 to 2.01	0.94
	Centro AA and C1C1	26		(15)	16.6	1	Ref.	Ref.
	Centro AA and C2C2	9		(5)	4.73	3.82	0.78 to 18.81	0.14
	Centro AA and C1C2	18		(10)	16.36	0.81	0.23 to 2.82	0.49
	Centro AA and C1C1/C1C2	44		(25)	16.6	0.33	0.07 to 1.48	0.23
	Centromeric A-associated KIR
	Others	88		(50)	13.33	1	Ref.	Ref.
	2DL1 and C2C2	12		(7)	5.73	3.539	0.08 to 0.98	0.05
	Others	49		(28)	6.11	1	Ref.	Ref.
	2DL3 and C1C1	51		(29)	9.69	0.81	0.42 to 1.57	0.55
	Centromeric B-associated KIR
	Others	75		(43)	9.69	1	Ref.	Ref.
	2DL2 and C1C1	25		(14)	7.4	1.18	0.55 to 2.55	0.27
	2DS2-	54		(31)	13.93	1	Ref.	Ref.
	2DS2+	46		(26)	5.979	1.437	0.74 to 2.79	0.2842
	2DS3-	70		(40)	10.15	1	Ref.	Ref.
	2DS3+	30		(17)	6.752	1.06	0.53 to 2.14	0.8697
	Telomeric B-associated KIR
	3DS1-	67		(38)	9.692	1	Ref.	Ref.
	3DS1+	33		(19)	6.752	1.156	0.57 to 2.37	0.6904
	2DS1-	61		(35)	8.805	1	Ref.	Ref.
	2DS1+	39		(22)	7.392	0.98	0.50 to 1.91	0.9526
	2DS5-	74		(42)	8.805	1	Ref.	Ref.
	2DS5+	26		(15)	7.326	1.094	0.52 to 2.30	0.813
	Telomeric A-associated KIR
	2DS4-	68		(39)	6.111	1	Ref.	Ref.
	2DS4+	32		(18)	8.805	1.054	0.53 to 2.09	0.8807
	Others	32		(19)	8.082	1	Ref.	Ref.
	3DL1+ and Bw4+	68		(38)	8.805	0.9455	0.48 to 1.85	0.8697
	3DL1+ and Bw4-I80+ (I80+=I80T80,I80Bw6, I80I80)	40		(23)	11.99	1	1	Ref.
	3DL1+ and Bw4-T80+ (T80+=T80I80,T80Bw6,T80T80)	28		(16)	5.98	1.81	0.71 to 4.60	0.4
	Others	60		(34)	6.11	1	Ref.	Ref.
	3DL1+ and Bw4-I80+ (T80+=T80I80,T80Bw6,T80T80)	40		(23)	11.99	1.058	0.26 to 0.99	0.51
	Others	72		(41)	8.8	1	Ref.	Ref.
	3DL1+ and Bw4-T80+ (I80+=I80T80,I80Bw6, I80I80)	28		(16)	5.98	1.57	0.68 to 3.62	0.55
	Telomeric KIR present on all haplotypes
	Others	75		(43)	6.111	1	Ref.	Ref.
	3DL2+ and A3/A11+	25		(14)	19.35	0.4348	0.22 to 0.88	0.02
	FCGR3A-158
	FF	30		(15)	9.347	1	Ref.
	VF/VV	70		(35)	13.93	0.5523	0.24 to 1.27	0.3698
	Selected KIR-HLA-FCGR3A gene combinations
	Others	82		(47)	6.11	1	Ref.	Ref.
	FCGR3A-158 VF/VV and KIR3DL2+HLA-A3/A11	18		(10)	>32.33	0.35	0.16 to 0.74	0.007
	Others	86		(49)	6.11	1	Ref.	Ref.
	FCGR3A-158 VF/VV and KIR3DL1+Bw4 I80	14		(8)	19.35	0.65	0.28 to 1.46	0.16
	Others	70		(40)	5.98	1	Ref.	Ref.
	FCGR3A-158 VF/VV and KIR2DL3+C1C1	30		(17)	13.93	0.63	0.32 to 1.24	0.63
	Others	86		(49)	6.11	1	Ref.	Ref.
	KIR3DL1+Bw4 I80 and KIR2DL3+C1C1	14		(8)	19.35	0.65	0.28 to 1.46	0.16
	Others	88		(50)	7.39	1	Ref.	Ref.
	KIR3DL2+HLA-A3/A11 and KIR3DL1+Bw4 I80	12		(7)	19.35	0.55	0.24 to 1.25	0.31
	Others	82		(47)	7.39	1	Ref.	Ref.
	KIR3DL2+HLA-A3/A11 and KIR2DL3+C1C1	18		(10)	19.35	0.45	0.21 to 0.96	0.04
